Sarikaya et al. Hawai'ian *Drosophila*

1 **Reproductive capacity evolves in response to ecology through common developmental**  
2 **mechanisms in Hawai'ian *Drosophila***

3

4 Didem P. Sarikaya<sup>1,2\*</sup>, Samuel H. Church<sup>1</sup>, Laura P. Lagomarsino<sup>3</sup>, Karl N. Magnacca<sup>4</sup>, Steven  
5 Montgomery<sup>4</sup>, Donald K. Price<sup>5,6</sup>, Kenneth Y. Kaneshiro<sup>7</sup> and Cassandra G. Extavour<sup>1,8\*</sup>

6

7 1. Department of Organismic and Evolutionary Biology, Harvard University, Cambridge  
8 MA 02138

9 2. *Current address*: Evolution and Ecology Department, University of California Davis,  
10 Davis CA 95616

11 3. Biological Sciences, Louisiana State University, Baton Rouge LA 70803

12 4. Bishop Museum, 1525 Bernice Street, Honolulu HI 96817

13 5. Biology Department, University of Hawaii Hilo, Hilo HI 96720

14 6. *Current address*: Life Sciences, University of Nevada Las Vegas, Las Vegas NV 89154

15 7. Pacific Biosciences Research Center, University of Hawai'i at Manoa, Manoa HI 96822

16 8. Department of Molecular and Cellular Biology, Harvard University, Cambridge MA  
17 02138

18

19 \* correspondence to D.P.Sarikaya [didemps@gmail.com](mailto:didemps@gmail.com), Evolution and Ecology Department,  
20 University of California Davis, Davis CA 95616

21 C.G.Extavour [extavour@oeb.harvard.edu](mailto:extavour@oeb.harvard.edu), Department of Organismic and  
22 Evolutionary Biology, Department of Molecular and Cellular Biology,  
23 Harvard University, Cambridge MA 02138

24

25

26 *Short Title*: Reproductive evolution through ecology and development

27

28

29

30 **Abstract**

31 Lifetime reproductive capacity, or the total number of offspring that an individual can give rise  
32 to in its lifetime, is a fitness component critical to the evolutionary process. In insects, female  
33 reproductive capacity is largely determined by the number of ovarioles, the egg-producing  
34 subunits of the ovary. Recent work has provided insights into the genetic and environmental  
35 control of ovariole number in *Drosophila melanogaster*. However, whether regulatory  
36 mechanisms discovered under laboratory conditions also explain evolutionary variation in  
37 natural populations is an outstanding question. Here we report, for the first time, insights into the  
38 mechanisms regulating ovariole number and its evolution among Hawai'ian *Drosophila*, a large  
39 adaptive radiation of fruit flies in which the highest and lowest ovariole numbers of the genus  
40 have evolved within 25 million years. Using phylogenetic comparative methods, we show that  
41 ovariole number variation among Hawai'ian *Drosophila* is best explained by adaptation to  
42 specific oviposition substrates. Further, we show that evolution of oviposition on ephemeral egg-  
43 laying substrates is linked to changes the allometric relationship between body size and ovariole  
44 number. Finally, we provide evidence that the developmental mechanism principally responsible  
45 for controlling ovariole number in *D. melanogaster* also regulates ovariole number in natural  
46 populations of Hawai'ian drosophilids. By integrating ecology, organismal growth, and cell  
47 behavior during development to understand the evolution of ovariole number, this work connects  
48 the ultimate and proximate mechanisms of evolutionary change in reproductive capacity.

49

50 **Keywords:** ovary, ovariole, terminal filament, adaptive radiation, allometry, constraint

## 51 **Introduction**

52           Reproductive capacity is an important life history trait that directly influences fitness by  
53 determining how many offspring an individual can leave behind. There is a wide range in  
54 potential fecundity across species (1, 2), which is often interpreted as trade-offs with presumed  
55 ecological and developmental constraints . Trade-offs have been invoked to explain patterns of  
56 egg-laying in animals, where total fecundity can correlate negatively with egg mass, clutch size  
57 or lifespan (3-10), and positively with body size (11-13). In addition to these hypothesized  
58 physical or growth-related constraints, life history parameters including predation risk,  
59 environmental variability, host specialization and levels of parental care have been proposed to  
60 influence evolutionary change in fecundity (1, 14-17), suggesting that this trait could represent a  
61 complex intersection between ecology and physiology. However, few studies have addressed  
62 how female reproductive capacity evolves in response to ecology, and how these pressures  
63 manifest as different phenotypes through changes in development.

64           In insects, female reproductive capacity is strongly influenced by the number of egg-  
65 producing structures called ovarioles (1, 18-23). Ovariole number is species-specific and  
66 genetically determined (24, 25). Most insects have limited intraspecific variation in ovariole  
67 number, and the effect of ovariole number on fecundity has been observed by comparing mean  
68 ovariole numbers within or between species. In many insects, including beetles, fruit flies, and  
69 aphids, ovariole number is positively correlated with fecundity between and within species (1,  
70 21-23). For example, *Drosophila melanogaster* strains with naturally occurring or genetically  
71 manipulated higher ovariole numbers both show increased fecundity (18, 26). While  
72 physiological traits like egg production rate may also play an important role in determining  
73 reproductive capacity (27), these can be difficult to assess in laboratory settings where egg-

74 laying conditions may not be suitable for some insects. In contrast, ovariole number has served  
75 as a proxy for reproductive capacity for decades (18), as it is a quantitative trait that can be easily  
76 measured from field and laboratory samples.

77 Ovariole number is established during larval and pupal stages (20), and can be affected  
78 by environmental conditions during this phase of development, including nutrition and  
79 temperature (24, 28, 29). During larval development, a specific group of cells called terminal  
80 filament cells (TFCs) form stacks called terminal filaments (TFs) that serve as the beginning  
81 point of each ovariole (30-33). Developmental mechanisms of ovariole number evolution are  
82 best characterized in species of the African *melanogaster* subgroup of *Drosophila*, where  
83 average ovariole number ranges from 43 to 18 per female (1, 34), and ovariole number  
84 differences result primarily from changes in TFC number (29, 35). Ovariole number is highly  
85 polygenic and regulated by pleiotropic genes (25), thus offering an opportunity to study the  
86 evolution of a complex quantitative trait in response to different environments.

87 Major shifts in ovariole number have been attributed to aspects of life history.  
88 Ovoviviparity, where females oviposit first instar larvae, is often correlated with reduced  
89 ovariole number (16), suggesting that increased parental investment is linked to reduced  
90 fecundity as observed in other animals (17). The stability of the environment and the  
91 predictability of egg-laying substrates may influence evolution of ovariole number, as more  
92 stable environments or abundant substrates are correlated with higher ovariole number, and  
93 species occupying unpredictable environments or scarce substrates tend to have lower ovariole  
94 numbers (15, 36). In the well-studied *Drosophila melanogaster* subgroup, previous studies have  
95 suggested that reproductive strategies and ovariole number evolve in response to oviposition or  
96 larval nutrition substrate (35-37). Most *melanogaster* subgroup species are generalists that

Sarikaya et al. Hawai'ian *Drosophila*

97 oviposit on a variety of decaying fruits, and mean ovariole number in this subgroup ranges from  
98 43 to 18 per female (1, 34). In contrast, *D. erecta* and *D. sechellia* are specialists on *Pandanus*  
99 fruit and the toxic *Morinda* fruit, respectively (38, 39), and *D. sechellia* has the lowest reported  
100 ovariole number of the group (1). This reduction in ovariole number has been hypothesized to be  
101 the result of increased egg size as an adaptation to feeding on the toxic *Morinda* (40), or to be  
102 due to lower insulin signaling levels evolved in response to the relatively constant nutritional  
103 input provided by substrate specialization (35). Reviewing data on oviposition behavior in  
104 *melanogaster* subgroup species, Lachaise (37) proposed that the high ovariole number observed  
105 in the generalists *D. melanogaster* and *D. simulans* may be driven by the frequent oviposition  
106 opportunities available to these species, as they oviposit on most decaying fruit. However, the  
107 *melanogaster* subgroup is not well-suited for a broader understanding of ovariole number  
108 evolution, as most species share similar oviposition substrates (i.e. rotting fruit) and there are few  
109 independent instances of evolution of specialists.

110 In contrast, Hawai'ian *Drosophila* have evolved to specialize on a variety of oviposition  
111 substrates, including decaying flowers, leaves, fungi, sap fluxes, and bark of native plants, and  
112 eggs of native spiders (41). Moreover, these flies exhibit the most extreme interspecies range of  
113 ovariole number reported in the genus, ranging from two to 101 per ovary (42). Hawai'ian  
114 *Drosophila* have undergone rapid island radiation from a common ancestor in the last 25 million  
115 years, leading to over 1000 extant species (43-45). The high species diversity of Hawai'ian  
116 *Drosophila* is spread across five monophyletic species groups that share genetic, morphological  
117 and ecological similarities, and rely on different oviposition substrates (44, 46-48), as follows  
118 (Figure 1): *Scaptomyza* are small species that primarily lay eggs on leaves or flowers. Picture  
119 wing (PW) species are larger species with striking pigment patterns on their wings (49). PW

Sarikaya et al. Hawai'ian *Drosophila*

120 species primarily lay eggs on decaying bark or branches of native trees, though some specialize  
121 on sap fluxes (41). Modified mouthpart (MM) species, which have male-specific modifications  
122 on mouthparts used during mating (50), have the largest range of egg-laying substrates,  
123 specializing on decaying leaves, fungi, sap or bark (51). Haleakala species are darkly pigmented  
124 flies that only lay eggs on native fungi. Lastly, most antopocerus-modified tarsus-ciliated tarsus  
125 (AMC) species are leaf breeders, though there are a few exceptions that have evolved bark-  
126 breeding (44).

127 Ovariole number is highest in the PW species (up to 202 per female), and lowest in  
128 *Scaptomyza* and AMC species (as few as 2 per female) (42). Dramatic differences in ovariole  
129 number between species have been hypothesized to be a result of shifts between their varied  
130 oviposition substrates (42, 51). Other studies have posited that the divergent ovariole number  
131 observed in Hawai'ian *Drosophila* may be a result of r-K evolution (42), given the surface area  
132 of decaying trees, and the predictability of this substrate in the field (36), is greater than that of  
133 other oviposition substrates (51, 52). However, the studies supporting these hypotheses primarily  
134 sampled PW species, and used phylogenies that have since been substantially improved upon in  
135 more recent studies that include expanded taxon sampling and additional loci (44, 46, 48, 53).

136 To investigate the linked effects of ecology and development underlying ovariole number  
137 evolution in Hawai'ian *Drosophila*, we conducted phylogenetic comparative analyses of life  
138 history traits from 60 species, and comparative development analyses from ten species using  
139 both wild-caught flies and laboratory strains. Our results identify potential mechanisms of  
140 evolutionary change in ovariole number operating at three levels of biological organization. First,  
141 we found that evolutionary shifts in ecological niche could predict the dramatic differences in  
142 ovariole number in Hawai'ian *Drosophila*. Second, whether adult body size was coupled with

143 ovariole number or egg volume differed between species groups with different oviposition  
144 substrates, suggesting that the allometric growth relationships between these traits evolves  
145 dynamically. Finally, we found that changes in ovariole number from two to 60 per individual  
146 can be explained by changes in total TFC number, suggesting that ovariole number diversity  
147 evolves through the same developmental mechanism, regardless of the specific ecological  
148 constraints or selective pressures.

149

## 150 **Results and Discussion**

### 151 *Adult reproductive traits of Hawai'ian Drosophila*

152 We measured three major adult traits relevant to reproductive capacity (body size,  
153 ovariole number and egg volume), from field-collected females, lab-reared F1 offspring of field-  
154 collected females, and females from laboratory strains (Figure 1; Table S1). Species identities of  
155 field-collected females were assigned based on morphological keys or DNA barcoding (Tables  
156 S2, S3). All traits ranged over an order of magnitude within Hawai'ian *Drosophila*: body size  
157 ranged from 0.71mm for *S. devexa* to 3.12mm for *D. melanocephala*, ovariole number per  
158 female ranged from 2 for *S. caliginosa* to 88.5 for *D. melanocephala*, and egg volume ranged  
159 from 0.01  $\mu\text{m}^3$  for *Bunostoma spp.* group (*S. palmae*/*S. anomala*) to 0.2 $\mu\text{m}^3$  for *D. adunca*,  
160 highlighting the diversity of life history traits in Hawai'ian *Drosophila*.

161 Within the *melanogaster* subgroup species, species-specific differences in ovariole  
162 number are largely heritable (25, 54, 55). To test whether this is also the case in Hawai'ian  
163 *Drosophila*, we compared ovariole number of wild-caught females and their lab-reared F1  
164 offspring, across five species with different egg-laying substrates. We observed no significant  
165 differences between the ovariole numbers of these two generations regardless of natural substrate

166 (Figure S1), indicating that species-specific differences in ovariole number are also strongly  
167 genetically determined in Hawai'ian *Drosophila*.

168

169 *Larval ecology influences ovariole number evolution*

170 A previous study based almost exclusively on picture wing species proposed that  
171 evolutionary shifts in larval ecology had driven ovariole number diversification in these flies  
172 (51). To test this hypothesis across the major groups of Hawai'ian *Drosophila*, we compared the  
173 fit of evolutionary models of ovariole number that accounted for ecologically driven evolution,  
174 to those that did not. Our dataset included both specialist species that oviposit on one of bark, sap  
175 flux, leaf, fungus, fruit, flower or spider-eggs, as well as generalist species that oviposit on  
176 multiple decaying substrates (Figure S2). We compared the fit of five models to our data, two of  
177 which ((i) Brownian Motion, BM, and (ii) an Ornstein Uhlenbeck model with a shared optimum  
178 for all species, OU1) do not take into account the oviposition substrate, and three of which were  
179 nested ecological models based on alternative methods of substrate classification: (iii) OU2  
180 assumed two states, bark breeders and all other species, to test previous suggestions that bark-  
181 breeding may drive evolution of ovariole number (51, 52); (iv) OU3 assumed three states,  
182 *Scaptomyza* specialists on spider eggs and flowers, bark-breeders, and species using any other  
183 substrate, to test proposals that substrates influence ovariole number evolution because of their  
184 differences in carrying capacity and field predictability (36, 42); and (v) OU8 categorized each  
185 oviposition substrate separately. These five models were fit over 100 trees sampled from the  
186 posterior distribution of a Bayesian phylogenetic analysis to account for phylogenetic  
187 uncertainty.



188 We found that models accounting for larval ecology explained the ovariole number  
189 diversification in Hawai'ian *Drosophila* (Table 1) better than those that did not. Comparing the  
190 three ecological models, we found that the three-state model (OU3), which accounted for both  
191 bark breeders and *Scaptomyza* specialists, was supported as the best-fit model across a majority  
192 of trees for ovariole number ( $\Delta\text{AICc} > 2$  as compared to OU2 and OU8 models; Table S4).  
193 Estimated theta values for the OU3 model showed that bark breeders have more ovarioles than  
194 species that oviposit on other substrates, suggesting that evolution of higher ovariole numbers  
195 accompanied the transition to bark breeding from likely non-bark breeding ancestors (Fig. 2A,B,  
196 Table S5), consistent with earlier hypotheses (51, 52). In contrast, *Scaptomyza* species may have  
197 experienced a dramatic decrease in ovariole number as they independently specialized on spider  
198 eggs and flowers (Fig. 2B). Taken together, our results suggest that shifts in oviposition substrate  
199 may have contributed to the evolution of diverse ovariole numbers in this group, not only for  
200 picture wing flies as predicted previously (51), but across the adaptive radiation of Hawai'ian  
201 *Drosophila*.

202 In African drosophilids and tephritid *Dacus* flies, generalist species that oviposit on a  
203 variety of egg-laying substrates have higher fecundity than specialists (1, 22, 37). Moreover,  
204 specialist species of African and Central American *Drosophila* species are more fit in the  
205 presence of host-specific compounds (40, 56-58), some of which are toxic to other species of  
206 *Drosophila*. For example, *D. sechellia* is best reared on lab media supplemented with *Morinda*  
207 fruit (40), while *D. pachea* cannot be reared in laboratory conditions without supplementing  
208 media with sterols from its host cactus (59). Egg-laying substrates for Hawai'ian *Drosophila*  
209 have divergent chemical cues and fungal populations (60). Hawai'ian *Drosophila* often lay few  
210 eggs on unsupplemented laboratory food (see Supplemental Information), but do not change

211 ovariole number when reared on this food (Figure S1). We therefore speculate that specific  
212 substrate components may not only allow females to distinguish between hosts for oviposition,  
213 but also may contribute to species- and substrate-specific egg laying behavior in Hawai'ian  
214 *Drosophila*.

215

#### 216 *Evolution of specialist habitats changes allometry of reproductive traits*

217 The range of Hawai'ian *Drosophila* body sizes is greater than that of other members of  
218 the genus, spanning an order of magnitude (Table S1). To determine whether changes in  
219 allometric growth might underlie reproductive trait evolution, we analyzed the allometric ratio of  
220 such traits using a phylogenetic least squares (PGLS) analysis and thorax volume (thorax  
221 length<sup>3</sup>) as a proxy for body size. We found that across all Hawai'ian *Drosophila*, thorax volume  
222 was significantly positively correlated with both ovariole number (Figure 3A; Table 2; Table S6)  
223 and egg volume (Figure 3B; Table 2; Table S6). However, individual species groups show  
224 differences in trends for allometric ratios of reproductive traits. In PW and MM species, body  
225 size is correlated positively with ovariole number (Figure 3A1, A2), but not with egg volume  
226 (Figure 3B1, B2). In contrast, AMC and *Scaptomyza* species have a positive correlation with  
227 body size and egg volume (Figure 3B3, B4), but not ovariole number (Figure 3A3, A4). For PW,  
228 MM, and AMC, there is a negative correlation between ovariole number and proportional egg  
229 size (Table S2; Figure S3B-D), and there is a negative correlation between ovariole number and  
230 egg volume in AMC and *Scaptomyza* (Table 2; Figure S3I-J).

231 We note that these trends are associated with differences in life history strategies between  
232 groups. PW and MM group species, in which ovariole number increases with increasing body  
233 size (Figure 3A1, A2), lay eggs in abundant and varied substrates (41): PW are primarily bark

Sarikaya et al. Hawai'ian *Drosophila*

234 breeders that oviposit eggs in clutches of up to 100 eggs (42), and MM group species can occupy  
235 a wide range of oviposition preferences, including bark, leaf, fruit, fungus, and sap flux (41). In  
236 contrast, species of AMC and *Scaptomyza*, in which ovariole number and body size are  
237 decoupled (Figure 3A3, A4), have independently evolved use of substrates with low carrying  
238 capacity: AMC group species are primarily leaf breeders, reproducing on damp leaves in the  
239 forest bed, while the oviposition substrates of *Scaptomyza* species include ephemeral substrates,  
240 such as flowers, spider eggs and fresh leaves, many of which are not occupied by other  
241 Hawai'ian *Drosophila* species groups (41). In sum, while a positive correlation between body  
242 size and fecundity is commonly posited in egg-laying animals (11, 13), we did not find universal  
243 support for this trend across Hawai'ian *Drosophila*. This is, however, consistent with previous  
244 studies on Diptera, wherein trends toward higher fecundity or ovariole number in larger animals  
245 observed within species (11) contrast with between-species differences in ovariole number that  
246 do not always correlate with body size (22, 37, 61).

247

248 *Larval ovary somatic cell number determines ovariole number*

249 We previously identified two developmental mechanisms that can alter ovariole number  
250 during development: changes in TFC number per TF and change in total TFC number (29). To  
251 determine whether the same developmental mechanisms that regulate ovariole number in  
252 laboratory populations, also underlie the evolution of ovariole number in natural populations, we  
253 measured TF and TFC numbers in the developing larval ovaries of Hawai'ian *Drosophila*. Our  
254 analysis of 12 species representing four of the major Hawai'ian *Drosophila* species groups  
255 showed that even over a range of ovariole numbers spanning an order of magnitude (Figure 4;  
256 Table S7), larval TF number essentially corresponded to adult ovariole number (Table S8).

257 Although TFC number per TF varied somewhat between species (Figure 4A; Table S7), PGLS  
258 analysis showed no correlation between TFC number per TF and total TF number (Table 3). In  
259 contrast, average total TFC number was strongly positively correlated with TF number (Table 3;  
260 Figure 4B; Table S7), suggesting that, as in laboratory populations of *D. melanogaster*, changes  
261 in TFC number underlie ovariole number evolution in Hawai'ian *Drosophila*.

262 The developmental mechanism underlying ovariole number evolution is particularly  
263 interesting in light of the allometric changes in Hawai'ian *Drosophila* species groups. There has  
264 been some debate as to whether allometry constrains or facilitates adaptive evolution (62-64). In  
265 Hawai'ian *Drosophila*, the allometric relationship between two important female reproductive  
266 traits, ovariole number and egg size, was coupled to body size in different groups in different  
267 ways: when ovariole number was coupled with body size, egg size was not, and vice versa  
268 (Figure 3). These trends were associated with abundant versus scarce egg-laying substrates  
269 respectively (Figure 1). While the phenotypic integration of ovariole number and egg volume  
270 appears tightly regulated across insects (65), the coupling of ovariole number to body size  
271 appears more flexible in Hawai'ian *Drosophila*, suggesting that in this context, heritable changes  
272 in allometry may contribute to adaptive evolution.

273 Ovariole number is regulated by both by intrinsic and extrinsic growth factors, including  
274 Hippo signaling, ecdysone and insulin-like peptides, all of which can also regulate body size (26,  
275 35, 66-68). Thus, we propose that the mechanistic basis for evolutionary change of ovariole  
276 number on different substrates, may be changes in the relative influence of nutritionally  
277 regulated circulating growth factors on the one hand, and cell-autonomous growth on the other  
278 hand, on ovarian development during larval and pupal stages. For example, we speculate that on  
279 certain substrates, the larval ovary may become less sensitive to nutritionally-mediated growth

280 factors by evolving lower expression levels of growth factor receptors, and relying more on  
281 tissue-specific growth factors, which could include local insulin release or cell proliferation  
282 pathways such as Hippo signaling.

283 Taken together, we found that highly divergent ovariole number, and by proxy female  
284 reproductive capacity, have evolved together with changes in egg-laying substrate across  
285 Hawai'ian *Drosophila*. Moreover, this remarkable adaptive radiation is linked to evolutionary  
286 changes in a key reproductive trait that is regulated by variation in the same developmental  
287 mechanisms operating in the model species *D. melanogaster*.

288

## 289 **Materials and Methods**

290 Hawai'ian *Drosophila* were collected (69) at the Koke'e State Park and Kui'a NAR on  
291 Kauai, West Maui Watershed Reserve, Makawao Forest Reserve, and Waikamoi Nature Preserve  
292 on Maui, and the Volcanoes National Park and Upper Waiakea Forest Reserve on Hawai'i  
293 island. Field-caught flies were brought back to the lab for species identification and phenotyping  
294 of adult and larval characters. Measurements of adult ovariole number, larval TF and TFC  
295 number were performed as previously described (29). Mature egg size and adult body size were  
296 quantified from white light micrographs of eggs and adult thoraces using ImageJ. See  
297 Supplementary Information for detailed methods.

298 We combined sequence data for 18 genes reported in four previous studies (44, 46, 48,  
299 53) from GenBank with additional newly identified mitochondrial sequences (Table S9), and  
300 used the concatenated sequences to generate trees in RAxML v8.2.3 (70). Phylogenetic  
301 relationships and divergence time estimates were inferred in a Bayesian framework in BEAST v.

**Sarikaya et al. Hawai'ian *Drosophila***

302 2.3.2 (71, 72). All phylogenetic comparative analyses and corresponding figures were computed  
303 in R version 3.2.0 (73).

304 We used reported ecological information about Hawai'ian *Drosophila* to code oviposition  
305 site (41), calculated ancestral states for each of these character codings with BEAST using the  
306 *rayDISC* function in the R package **corHMM**, v.1.18 (74), mapped the most likely ecological  
307 state at each node, and pruned the resulting tree to include only tips with ovariole number data.  
308 The fit of different models of trait evolution was assessed on the pruned trees in **OUwie** v.1.48  
309 (75). See Supplementary Information for detailed methods and custom scripts.

310

311 **Acknowledgements**

312 This work was supported by National Institutes of Health grant number 1R01 HD073499 to  
313 CGE; National Science Foundation (NSF) Doctoral Dissertation Improvement Grant number  
314 DEB-1209570, a post-graduate scholarship from the Natural Sciences and Engineering Research  
315 Council of Canada (NSERC) and a pre-doctoral fellowship from the Fonds de recherche du  
316 Québec— Santé (FRQS) to DPS; NSF Graduate Training Fellowship to SHC; and NSF  
317 Postdoctoral Research Fellowship in Biology Grant number 1523880 to LPL.

## 318 References

- 319 1. R'kha S, Moreteau B, Coyne JA, & David JR (1997) Evolution of a lesser fitness trait: egg  
320 production in the specialist *Drosophila sechellia*. *Genetical research* 69:17-23.
- 321 2. McNab BK & Ellis HI (2006) Flightless rails endemic to islands have lower energy expenditures  
322 and clutch sizes than flighted rails on islands and continents. *Comp Biochem Phys A* 145(3):295-  
323 311.
- 324 3. Czesak ME & Fox CW (2003) Evolutionary ecology of egg size and number in a seed beetle:  
325 Genetic trade-off differs between environments. *Evolution* 57(5):1121-1132.
- 326 4. Garcia-Barros E (2000) Body size, egg size, and their interspecific relationships with ecological  
327 and life history traits in butterflies (Lepidoptera : Papilionoidea, Hesperioidea). *Biol. J. Linn. Soc.*  
328 70(2):251-284.
- 329 5. Martin TE, *et al.* (2006) Life-history and ecological correlates of geographic variation in egg and  
330 clutch mass among passerine species. *Evolution* 60(2):390-398.
- 331 6. Blackburn TM (1991) An Interspecific Relationship between Egg Size and Clutch Size in Birds.  
332 *Auk* 108(4):973-977.
- 333 7. Sinervo B & DeNardo DF (1996) Costs of Reproduction in the Wild: Path Analysis of Natural  
334 Selection and Experimental Tests of Causation. *Evolution* 50(3):1299-1313.
- 335 8. Liao WB, Lu X, & Jehle R (2014) Altitudinal variation in maternal investment and trade-offs  
336 between egg size and clutch size in the Andrew's toad. *Journal of Zoology* 293(2):84-91.
- 337 9. Partridge L & Gems D (2006) Beyond the evolutionary theory of ageing, from functional  
338 genomics to evo-gero. *Trends Ecol Evol* 21(6):334-340.
- 339 10. Edward DA & Chapman T (2011) Mechanisms underlying reproductive trade-offs: Costs of  
340 reproduction. *Mechanisms of Life History Evolution: The Genetics and Physiology of Life History*  
341 *Traits and Trade-Offs*:137-152.
- 342 11. Honek A (1993) Intraspecific Variation in Body Size and Fecundity in Insects - a General  
343 Relationship. *OIKOS* 66(3):483-492.
- 344 12. Blueweiss L, *et al.* (1978) Relationships between Body Size and Some Life-History Parameters.  
345 *Oecologia* 37(2):257-272.
- 346 13. Monroe MJ, South SH, & Alonzo SH (2015) The evolution of fecundity is associated with female  
347 body size but not female-biased sexual size dimorphism among frogs. *J. Evol. Biol.* 28(10):1793-  
348 1803.
- 349 14. Martin TE, Martin PR, Olson CR, Heidinger BJ, & Fontaine JJ (2000) Parental care and clutch  
350 sizes in North and South American birds. *Science* 287(5457):1482-1485.
- 351 15. Schaffer WM (1974) Optimal Reproductive Effort in Fluctuating Environments. *Am. Nat.*  
352 108(964):783-790.
- 353 16. Meier R, Kotrba M, & Ferrar P (1999) Ovoviviparity and viviparity in the Diptera. *Biol. Rev.*  
354 74(3):199-258.
- 355 17. Stearns SC (1989) Trade-Offs in Life-History Evolution. *Funct. Ecol.* 3(3):259-268.
- 356 18. David JR (1970) Le nombre d'ovarioles chez *Drosophila melanogaster*: relation avec la fécondité  
357 et valeur adaptive. *Archives de Zoologie Expérimentale et Générale* 111:357-370.
- 358 19. Klepsatel P, *et al.* (2013) Reproductive and post-reproductive life history of wild-caught  
359 *Drosophila melanogaster* under laboratory conditions. *J. Evol. Biol.* 26(7):1508-1520.
- 360 20. King RC (1970) *Ovarian Development in Drosophila melanogaster* (Academic Press, New York)  
361 p 227.
- 362 21. Faille A & Pluot-Sigwalt D (2015) Convergent Reduction of Ovariole Number Associated with  
363 Subterranean Life in Beetles. *PLoS ONE* 10(7):e0131986.
- 364 22. Fitt GP (1990) Comparative fecundity, clutch size, ovariole number and egg size of *Dacus tyroni*  
365 and *D. jarvisi*, and their relationship to body size. *Entomologia Experimentalis et Applicata*  
366 55:11-21.



Sarikaya et al. Hawai'ian *Drosophila*

- 367 23. Wellings PW, Leather SR, & Dixon AFG (1980) Seasonal-Variation in Reproductive Potential - a  
368 Programmed Feature of Aphid Life-Cycles. *J Anim Ecol* 49(3):975-985.
- 369 24. Taylor BJ & Whitman DW (2010) A test of three hypotheses for ovariole number determination  
370 in the grasshopper *Romalea microptera*. *Physiol Entomol* 35(3):214-221.
- 371 25. Orgogozo V, Broman KW, & Stern DL (2006) High-resolution quantitative trait locus mapping  
372 reveals sign epistasis controlling ovariole number between two *Drosophila* species. *Genetics*  
373 173(1):197-205.
- 374 26. Sarikaya DP & Extavour CG (2015) The Hippo pathway regulates homeostatic growth of stem  
375 cell niche precursors in the *Drosophila* ovary. *PLoS Genetics* 11(2):e1004962.
- 376 27. Branquart E & Hemptinne JL (2000) Development of ovaries, allometry of reproductive traits and  
377 fecundity of *Episyrphus balteatus* (Diptera : Syrphidae). *Eur J Entomol* 97(2):165-170.
- 378 28. Grenier AM & Nardon P (1994) The Genetic-Control of Ovariole Number in *Sitophilus-Oryzae* L  
379 (Coleoptera, Curculionidae) Is Temperature-Sensitive. *Genet. Sel. Evol.* 26(5):413-430.
- 380 29. Sarikaya DP, et al. (2012) The roles of cell size and cell number in determining ovariole number  
381 in *Drosophila*. *Dev. Biol.* 363:279-289
- 382 30. Sahut-Barnola I, Godt D, Laski FA, & Couderc J-L (1995) *Drosophila* Ovary Morphogenesis:  
383 Analysis of Terminal Filament Formation and Identification of a Gene Required for This Process.  
384 *Dev. Biol.* 170(1):127-135.
- 385 31. Godt D & Laski FA (1995) Mechanisms of cell rearrangement and cell recruitment in *Drosophila*  
386 ovary morphogenesis and the requirement of *bric à brac*. *Development* 121:173-187.
- 387 32. Green II DA, Sarikaya DP, & Extavour CG (2011) Counting in oogenesis. *Cell Tissue Res.*  
388 344(2):207-212.
- 389 33. Hodin J & Riddiford LM (1998) The ecdysone receptor and ultraspiracle regulate the timing and  
390 progression of ovarian morphogenesis during *Drosophila* metamorphosis. *Dev. Genes Evol.*  
391 208(6):304-317.
- 392 34. Markow TA & O'Grady PM (2007) *Drosophila* biology in the genomic age. *Genetics*  
393 177(3):1269-1276.
- 394 35. Green II DA & Extavour CG (2014) Insulin Signaling Underlies Both Plasticity and Divergence  
395 of a Reproductive Trait in *Drosophila*. *Proc. R. Soc. Lond. B. Biol. Sci.* 281(1779):20132673.
- 396 36. Montague JR, Mangan RL, & Starmer WT (1981) Reproductive Allocation in the Hawaiian  
397 *Drosophilidae* - Egg Size and Number. *American Naturalist* 118(6):865-871.
- 398 37. Lachaise D (1983) Reproductive Allocation in Tropical *Drosophilidae* - Further Evidence on the  
399 Role of Breeding-Site Choice. *Am. Nat.* 122(1):132-146.
- 400 38. Tsacas L & Bächli G (1981) *Drosophila sechellia*, n.sp., huitieme espece du sous-groupe  
401 melanogaster des Iles Sechelles [Diptera, *Drosophilidae*]. *Revue Francaise d'Entomologie*  
402 3(4):146-150.
- 403 39. Rio B, Couturier G, Lemeunier F, & Lachaise D (1983) Evolution d'une specialisation  
404 saisonniere chez *Drosophila erecta* (Dipt., *Drosophilidae*). *Annales de la Société Entomologique*  
405 *de France* 19:235-248.
- 406 40. Lavista-Llanos S, et al. (2014) Dopamine drives *Drosophila sechellia* adaptation to its toxic host.  
407 *eLife* 3:e03785.
- 408 41. Magnacca K, Foote D, & O'Grady PM (2008) A review of the endemic Hawaiian *Drosophilidae*  
409 and their host plants. *Zootaxa* 1728:1-58.
- 410 42. Kambysellis MP & Heed WB (1971) Studies of Oogenesis in Natural Populations of  
411 *Drosophilidae*. I. Relation of ovarian development and ecological habitats of the hawaiian  
412 species. *Am. Nat.* 941(105):31-49.
- 413 43. O'Grady P & DeSalle R (2018) Hawaiian *Drosophila* as an Evolutionary Model Clade: Days of  
414 Future Past. *BioEssays* 40(5):e1700246.
- 415 44. O'Grady PM, et al. (2011) Phylogenetic and ecological relationships of the Hawaiian *Drosophila*  
416 inferred by mitochondrial DNA analysis. *Mol Phylogenet Evol* 58(2):244-256.



- 417 45. Tamura K, Subramanian S, & Kumar S (2004) Temporal patterns of fruit fly (*Drosophila*)  
418 evolution revealed by mutation clocks. *Mol. Biol. Evol.* 21(1):36-44.
- 419 46. Lapoint RT, O'Grady PM, & Whiteman NK (2013) Diversification and dispersal of the Hawaiian  
420 Drosophilidae: the evolution of *Scaptomyza*. *Mol Phylogenet Evol* 69(1):95-108.
- 421 47. Lapoint RT, Gidaya A, & O'Grady PM (2011) Phylogenetic relationships in the spoon tarsus  
422 subgroup of Hawaiian *Drosophila*: conflict and concordance between gene trees. *Mol Phylogenet*  
423 *Evol* 58(3):492-501.
- 424 48. Magnacca KN & Price DK (2015) Rapid adaptive radiation and host plant conservation in the  
425 Hawaiian picture wing *Drosophila* (Diptera: Drosophilidae). *Mol. Phylogenet. Evol.* 92:226-242.
- 426 49. Edwards KA, Doescher LT, Kaneshiro KY, & Yamamoto D (2007) A database of wing diversity  
427 in the Hawaiian *Drosophila*. *PLoS ONE* 2(5):e487.
- 428 50. Magnacca KN & O'Grady PM (2006) A Subgroup Structure for the Modified Mouthparts  
429 Species Group of Hawaiian *Drosophila*. *Proceedings Of The Hawaiian Entomological Society*  
430 38:87-101.
- 431 51. Kambysellis MP, et al. (1995) Pattern of ecological shifts in the diversification of Hawaiian  
432 *Drosophila* inferred from a molecular phylogeny. *Curr. Biol.* 5(10):1129-1139.
- 433 52. Craddock EM & Kambysellis MP (1997) Adaptive Radiation in the Hawaiian *Drosophila*  
434 (Diptera: Drosophilidae): Ecological and Reproductive Character Analyses. *Pacific Science*  
435 51(4):475-489.
- 436 53. Lapoint RT, Magnacca KM, & O'Grady PM (2014) Phylogenetics of the Antopocerus-Modified  
437 Tarsus Clade of Hawaiian *Drosophila*: Diversification across the Hawaiian Islands. *PLoS ONE*  
438 9(11):e113227.
- 439 54. Wayne ML, et al. (2001) Quantitative trait locus mapping of fitness-related traits in *Drosophila*  
440 *melanogaster*. *Genetical research* 77(1):107-116.
- 441 55. Bergland AO, Genissel A, Nuzhdin SV, & Tatar M (2008) Quantitative trait loci affecting  
442 phenotypic plasticity and the allometric relationship of ovariole number and thorax length in  
443 *Drosophila melanogaster*. *Genetics* 180(1):567-582.
- 444 56. Peluso D, Soto EM, Kreiman L, Hasson E, & Mensch J (2016) Contrasting Plasticity in Ovariole  
445 Number Induced by A Dietary Effect of the Host Plants between Cactophilic *Drosophila* Species.  
446 *Insects* 7(2).
- 447 57. Lang M, et al. (2012) Mutations in the neverland Gene Turned *Drosophila pachea* into an  
448 Obligate Specialist Species. *Science* 337(6102):1658-1661.
- 449 58. Matzkin LM, Johnson S, Paight C, Bozinovic G, & Markow TA (2011) Dietary Protein and  
450 Sugar Differentially Affect Development and Metabolic Pools in Ecologically Diverse  
451 *Drosophila*. *J. Nutr.* 141(6):1127-1133.
- 452 59. Heed WB & Kircher HW (1965) Unique Sterol in Ecology and Nutrition of *Drosophila Pachea*.  
453 *Science* 149(3685):758-&.
- 454 60. Ort BS, Bantay RM, Pantoja NA, & O'Grady PM (2012) Fungal Diversity Associated with  
455 Hawaiian *Drosophila* Host Plants. *PLoS ONE* 7(7):e40550.
- 456 61. Soto IM, et al. (2014) Differences in tolerance to host cactus alkaloids in *Drosophila koepferae*  
457 and *D. buzzatii*. *PLoS ONE* 9(2):e88370.
- 458 62. Smith JM, et al. (1985) Developmental Constraints and Evolution. *Q. Rev. Biol.* 60(3):265-287.
- 459 63. Lande R (1985) Genetic and Evolutionary Aspects of Allometry. *Size and Scaling in Primate*  
460 *Biology*, Advances in Primatology, ed Jungers WJ (Plenum Press, New York), pp 21-32.
- 461 64. Bonduriansky R (2007) Sexual selection and allometry: a critical reappraisal of the evidence and  
462 ideas. *Evolution* 61(4):838-849.
- 463 65. Berrigan D (1991) The allometry of egg size and number in insects. *OIKOS* 60:313-321.
- 464 66. Hodin J & Riddiford LM (2000) Parallel alterations in the timing of ovarian ecdysone receptor  
465 and ultraspiracle expression characterize the independent evolution of larval reproduction in two  
466 species of gall midges (Diptera: Cecidomyiidae). *Dev. Genes Evol.* 210(7):358-372.

Sarikaya et al. Hawai'ian *Drosophila*

- 467 67. Gancz D, Lengil T, & Gilboa L (2011) Coordinated regulation of niche and stem cell precursors  
468 by hormonal signaling. *PLoS Biol.* 9(11):e1001202.
- 469 68. Gancz D & Gilboa L (2013) Insulin and Target of rapamycin signaling orchestrate the  
470 development of ovarian niche-stem cell units in *Drosophila*. *Development* 140(20):4145-4154.
- 471 69. Markow TA & O'Grady PM (2006) Chapter 4 - Collecting *Drosophila* in the wild. *Drosophila: A*  
472 *Guide to Species Identification and Use*, (Academic Press), pp 145-153.
- 473 70. Stamatakis A (2006) RAxML-VI-HPC: maximum likelihood-based phylogenetic analyses with  
474 thousands of taxa and mixed models. *Bioinformatics* 22(21):2688-2690.
- 475 71. Bouckaert R, et al. (2014) BEAST 2: A Software Platform for Bayesian Evolutionary Analysis.  
476 *Plos Computational Biology* 10(4).
- 477 72. Drummond AJ & Rambaut A (2007) BEAST: Bayesian evolutionary analysis by sampling trees.  
478 *BMC Evol. Biol.* 7.
- 479 73. Team RC (2015) R: A language and environment for statistical computing. R Foundation for  
480 Statistical Computing, Vienna, Austria.
- 481 74. Beaulieu JM, Oliver JC, & O'Meara B (2012) corHMM: Hidden Markov Models in R, Version  
482 1.0.
- 483 75. Beaulieu JM & O'Meara B (2014) OUwie: Analysis of Evolutionary Rates in an OU Framework.  
484 *R package version 1*.
- 485 76. Pinheiro J, Bates D, DebRoy S, Sarkar D, & Team RC (2014) Nlme: Linear and Nonlinear Mixed  
486 Effects Models. *R Package Version 3.1-117* <https://CRAN.R-project.org/package=nlme>.
- 487

488

489 **Figure Legends**

490

491 **Figure 1. Reproductive and ecological traits of Hawai'ian *Drosophila* in phylogenetic**

492 **context.** Compiled adult life history traits (greyscale gradients) collected herein and by

493 Kambysellis and Heed (42) are mapped on a phylogeny of Hawai'ian *Drosophila* constructed

494 from available mitochondrial and nuclear genes. Egg-laying substrate of each species is indicated

495 by colored boxes: bark (brown), generalist (black), sap flux (yellow), leaf (green), fungus

496 (purple), fruit (red), spider eggs (blue), flowers (pink), and unknown (gray). Boxes with solid

497 outlines denote data collected in the present study; boxes with four notches denote data

498 represented in our data and those of Kambysellis and Heed (42); boxes with dotted outline

499 denote data represented only in Kambysellis and Heed (42). Missing boxes indicate data points

500 that were either not previously reported (42) or that we were unable to obtain from field-caught

501 samples. Black lines at right delineate the five major groups of Hawai'ian *Drosophila* as follows:

502 SCAP = *Scaptomyza*; PW = picture wing; MM = modified mouthparts; H = Haleakala; AMC =

503 antopocerus-modified tarsus-ciliated tarsus.

504

505 **Figure 2. Different ecological states tested for OU analysis.** (A) A two-state model (OU2) of

506 bark-breeders (brown) and non-bark breeders (white). (B) Three-state model (OU3) that codes

507 bark-breeders (brown), spider egg and flower breeders (blue), and other oviposition substrates

508 (white). (C) Eight-state model (OU8) that codes each egg-laying substrate separately, color

509 coded as in Figure 1. Pie charts show the maximum likelihood ancestral state estimates at each

510 node, calculated with the rayDISC function in the R package **corHMM**, v.1.18 (74).

511

512 **Figure 3. Allometric relationship between life history traits in Hawai'ian *Drosophila*.**

513 Scatter plots of log transformed adult measurements with phylogenetically transformed trend  
514 lines generated by averaging runs from PGLS analysis across 100 posterior distribution BEAST  
515 trees, performed with the R package **nlme** v.3.1-121 (76). Trend line of the consensus tree is  
516 denoted in red when there was a significant relationship between the two traits, and black when  
517 PGLS analysis did not support a significant relationship (Table 2). (A, A1-A4) Ovariole number  
518 plotted against thorax volume ( $\text{mm}^3$ ) in (A) all specimens, (A1) PW, (A2) MM, (A3) AMC, and  
519 (A4) *Scaptomyza*. (B, B1-B4) Egg volume ( $\mu\text{m}^3$ ) plotted against thorax volume ( $\text{mm}^3$ ) in (B) all  
520 specimens, (B1) PW, (B2) MM, (B3) AMC, and (B4) *Scaptomyza*.

521

522 **Figure 4. Terminal filament cell (TFC) number predicts terminal filament (TF) number in**

523 **Hawai'ian *Drosophilids*.** (A-C) Bar graphs for (A) TFC number per TF, (B) total TFC number,  
524 and (C) TF number per larval ovary representing the mean and standard deviation, as well as the  
525 phylogenetic relationship between the species shown (bottom). (D-F) Late third instar larval  
526 ovaries stained for nuclei (purple) and F-actin (green) for (D) *S. caliginosa* (flower breeder), (E)  
527 *D. silvestris* (bark breeder), (G) *D. mitchelli* (egg-laying substrate unknown), and (F) *D.*  
528 *tanythrix* (leaf breeder). Numbers in parentheses beside species names indicate mean ovariole  
529 number per ovary (Tables S7, S8). White arrowheads indicate TF structures in the ovary.

530

531 **Figure 1**

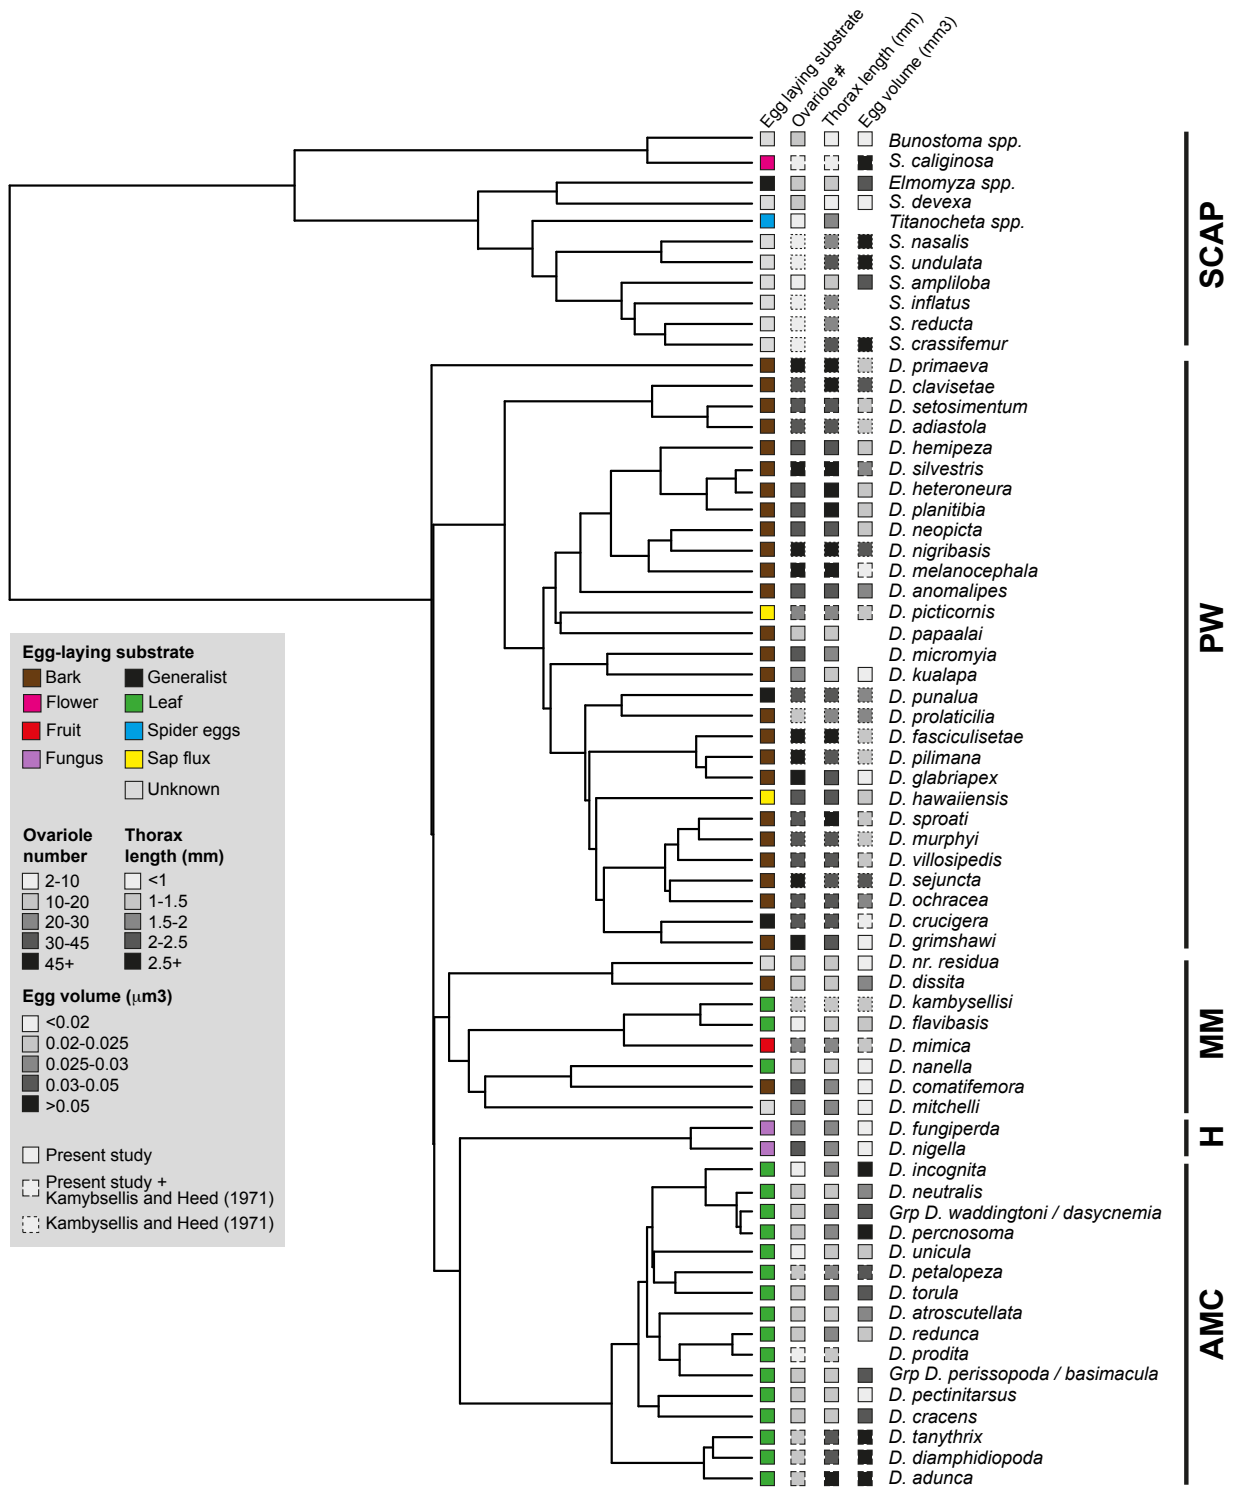

532

533 **Figure 2**

534

**(A) Two state (OU2)**

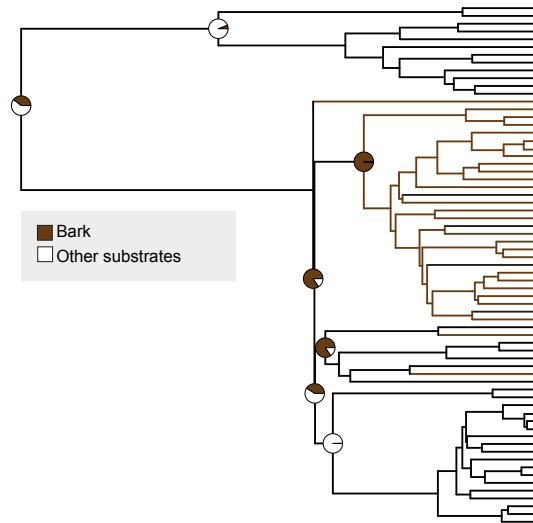

**(B) Three state (OU3)**

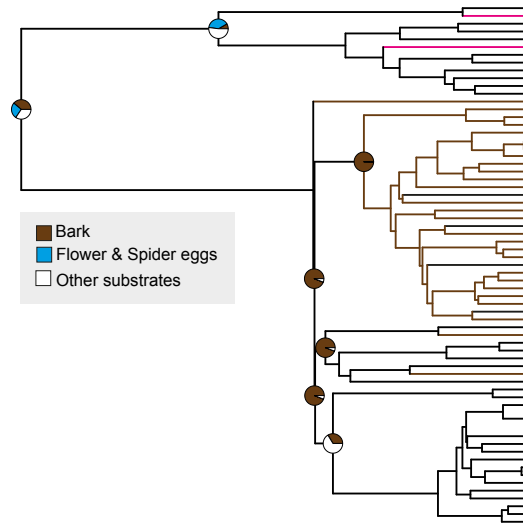

**(C) Eight state (OU8)**

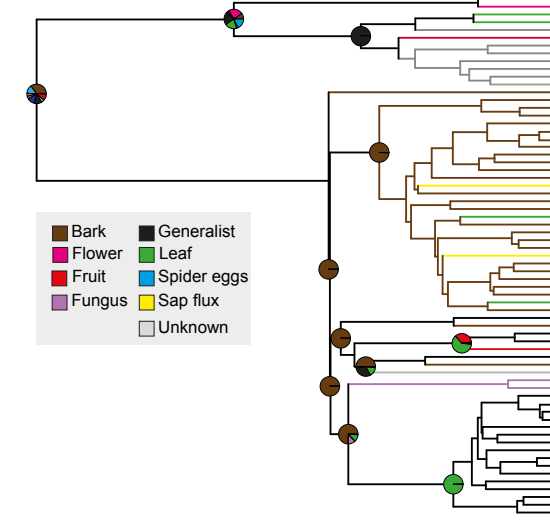

535

536 Figure 3

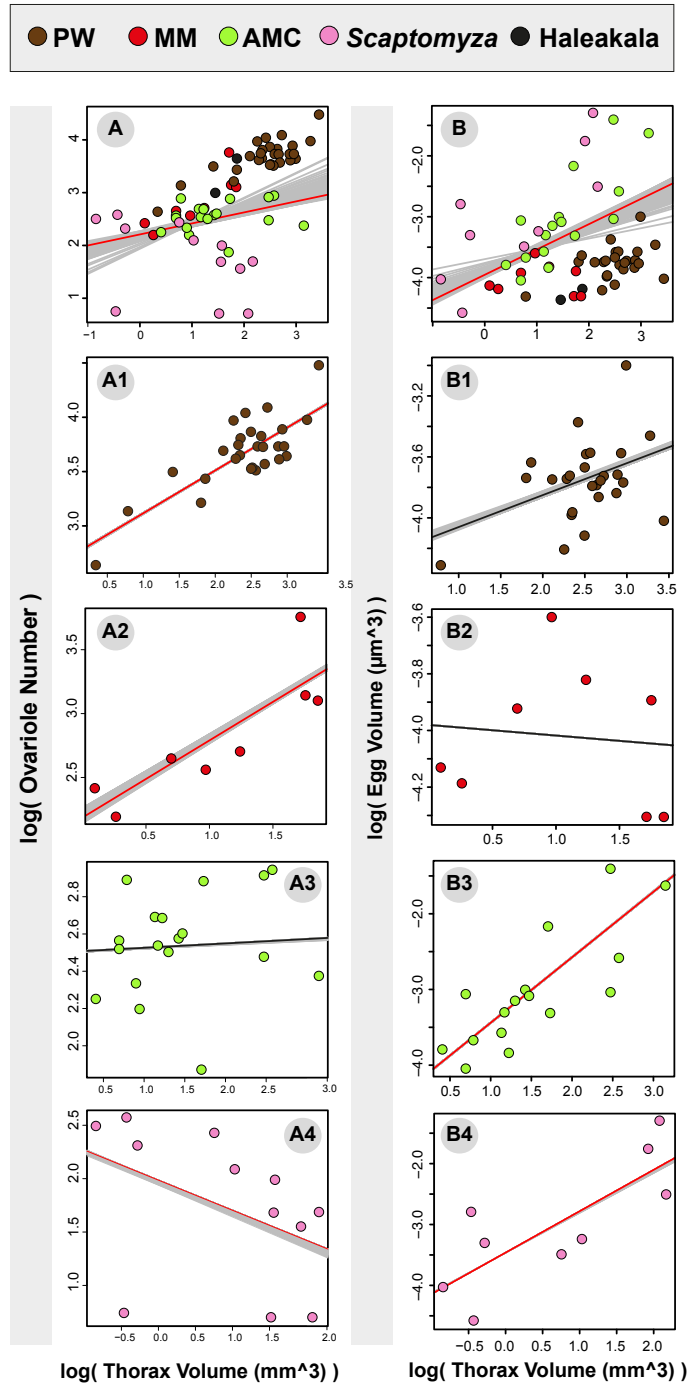

537

538 **Figure 4**

539

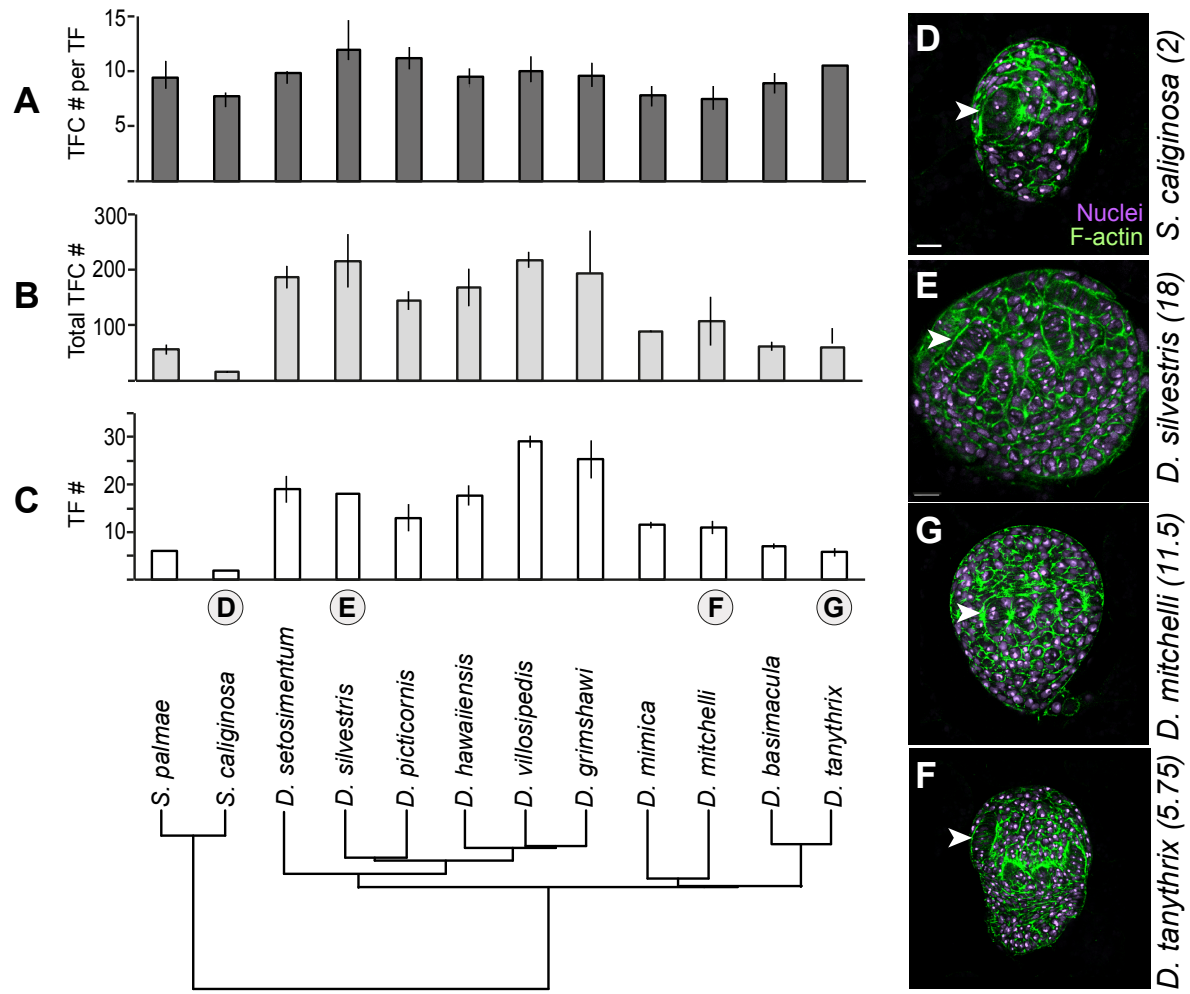

540



541 **Table 1. Comparison of AICc and weighted AICc values for models testing the relationship**  
542 **between oviposition substrate and ovariole number.** Values are for model fit of Brownian  
543 motion (BM) and Ornstein-Uhlenbeck with one optimum (OU1) or with multiple optima (OUM)  
544 with different combinations of oviposition substrate categories, calculated with the R package  
545 **OUwie** v.1.48 (75). Oviposition substrates were categorized as follows: OU2 categorizes species  
546 that lay eggs on bark and non-bark; OU3 categorizes species into bark-breeder, spider egg/flower  
547 breeder, and other; and OU8 categorizes each species according to the eight oviposition  
548 substrates represented (bark, flower, spider egg, fruit, leaf, generalist, fungus, sap flux). Models  
549 were tested over 1000 posterior distribution BEAST trees using nuclear and mitochondrial gene  
550 sequences. Bold indicates the best supported model.  
551

|            | AICc         | $\Delta$ AICc | w(AIC)      |
|------------|--------------|---------------|-------------|
| BM         | 86.26        | 5.91          | 0.04        |
| OU1        | 88.41        | 8.06          | 0.01        |
| OU2        | 84.84        | 4.49          | 0.1         |
| <b>OU3</b> | <b>80.35</b> | <b>0</b>      | <b>0.77</b> |
| OU8        | 84.42        | 4.07          | 0.08        |

552

553

554 **Table 2. Phylogenetic Generalized Least Squares (PGLS) analysis of adult reproductive traits in Hawai'ian *Drosophila*.** PGLS  
 555 analysis of relationships between ovariole number and thorax volume (mm<sup>3</sup>), egg volume (μm<sup>3</sup>) and thorax volume, and ovariole  
 556 number and proportional egg volume (μm<sup>3</sup>/mm<sup>3</sup>) are listed. Regression analyses were performed with the R package **nlme** v.3.1-121  
 557 (76) on 100 trees from a BEAST posterior distribution using nuclear and mitochondrial genes, and the minimum, average, and  
 558 maximum slope and p-value for the analysis is included in the table. P-values below 0.01 are indicated in bold.  
 559

|                                                                  |         | All species groups |              |              | PW spp.      |              |              | AMC spp.     |              |              | MM spp.      |              |              | <i>Scaptomyza</i> spp. |              |              |
|------------------------------------------------------------------|---------|--------------------|--------------|--------------|--------------|--------------|--------------|--------------|--------------|--------------|--------------|--------------|--------------|------------------------|--------------|--------------|
|                                                                  |         | min                | avg          | max          | min          | avg          | max          | min          | avg          | max          | min          | avg          | max          | min                    | avg          | max          |
| ON - Thorax volume (mm <sup>3</sup> )                            | Slope   | 0.234              | 0.292        | 0.500        | 0.412        | 0.416        | 0.424        | 0.014        | 0.019        | 0.020        | 0.572        | 0.598        | 0.627        | -                      | -            | -            |
|                                                                  | p-value | <b>0.000</b>       | <b>0.002</b> | 0.011        | <b>0.000</b> | <b>0.000</b> | <b>0.000</b> | 0.841        | 0.845        | 0.892        | <b>0.001</b> | <b>0.004</b> | <b>0.008</b> | 0.134                  | 0.150        | 0.174        |
| Egg volume (μm <sup>3</sup> ) - Thorax volume (mm <sup>3</sup> ) | Slope   | 0.156              | 0.353        | 0.407        | 0.164        | 0.185        | 0.164        | 0.745        | 0.748        | 0.760        | -            | -            | -            | 0.654                  | 0.679        | 0.680        |
|                                                                  | p-value | <b>0.000</b>       | <b>0.000</b> | 0.058        | 0.086        | 0.109        | 0.164        | <b>0.000</b> | <b>0.000</b> | <b>0.000</b> | 0.811        | 0.811        | 0.811        | <b>0.012</b>           | <b>0.012</b> | <b>0.016</b> |
| ON - Proportional Egg volume (μm <sup>3</sup> /mm <sup>3</sup> ) | Slope   | -                  | -            | -            | -            | -            | -            | -            | -            | -            | -            | -            | -            | -                      | -            | -            |
|                                                                  | p-value | <b>0.000</b>       | <b>0.000</b> | <b>0.000</b> | <b>0.000</b> | <b>0.000</b> | <b>0.000</b> | <b>0.007</b> | <b>0.008</b> | <b>0.010</b> | <b>0.000</b> | <b>0.001</b> | <b>0.001</b> | 0.084                  | 0.170        | 0.306        |
| ON - Egg volume (μm <sup>3</sup> )                               | Slope   | 0.703              | -0.42        | 0.376        | 0.088        | 0.081        | -0.07        | 0.308        | 0.2224       | 0.161        | 0.689        | 0.689        | 0.689        | 0.784                  | 0.676        | 0.567        |
|                                                                  | p-value | <b>0.000</b>       | <b>0.000</b> | <b>0.000</b> | 0.674        | 0.695        | 0.739        | <b>0.008</b> | 0.049        | 0.127        | 0.396        | 0.396        | 0.397        | <b>0.001</b>           | <b>0.003</b> | <b>0.007</b> |

560  
561

562 **Table 3. Phylogenetic Generalized Least Squares (PGLS) analysis of larval ovarian**  
563 **measurements in Hawai'ian *Drosophila*.** Relationships between TF number and TFC number  
564 per TF, TF number and total TFC number, and total TFC number and TFC number per TF are  
565 listed. Regression analyses were performed with the R package **nlme** v.3.1-121 (76) on 100 trees  
566 from a BEAST posterior distribution using nuclear and mitochondrial genes, and the minimum,  
567 average, and maximum slope and p-value for the analysis is included in the table. P-values below  
568 0.01 are indicated in bold.  
569

|                            |         | min          | avg          | max          |
|----------------------------|---------|--------------|--------------|--------------|
| TF # - TFC # per TF        | Slope   | 0.320        | 0.744        | 1.728        |
|                            | p-value | 0.199        | 0.376        | 0.647        |
| TF # - Total TFC #         | Slope   | 0.873        | 0.873        | 0.873        |
|                            | p-value | <b>0.000</b> | <b>0.000</b> | <b>0.000</b> |
| TFC # per TF - Total TFC # | Slope   | 0.097        | 0.097        | 0.097        |
|                            | p-value | 0.059        | 0.059        | 0.059        |

570
